# Supplementary material for: Ugi reaction-derived prolyl peptide catalysts grafted on the renewable polymer polyfurfuryl alcohol for applications in heterogeneous enamine catalysis
Source: publisher site journal article supplement (doi:10.3762/bjoc.15.118), 2019-06-04
Supplement: Additional file 1 [file 1860-5397-15-118-S1.pdf]

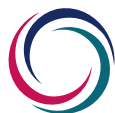

## Supporting Information

for

### **Ugi reaction-derived prolyl peptide catalysts grafted on the renewable polymer polyfurfuryl alcohol for applications in heterogeneous enamine catalysis**

Alexander F. de la Torre, Gabriel S. Scatena, Oscar Valdés, Daniel G. Rivera and Márcio W. Paixão

*Beilstein J. Org. Chem.* **2019**, *15*, 1210–1216. [doi:10.3762/bjoc.15.118](https://doi.org/10.3762/bjoc.15.118)

### **$^1\text{H}$ and $^{13}\text{C}$ NMR spectra of prolyl pseudo-peptide catalysts and chiral-phase HPLC analysis of Michael adducts**

## Spectra of compounds

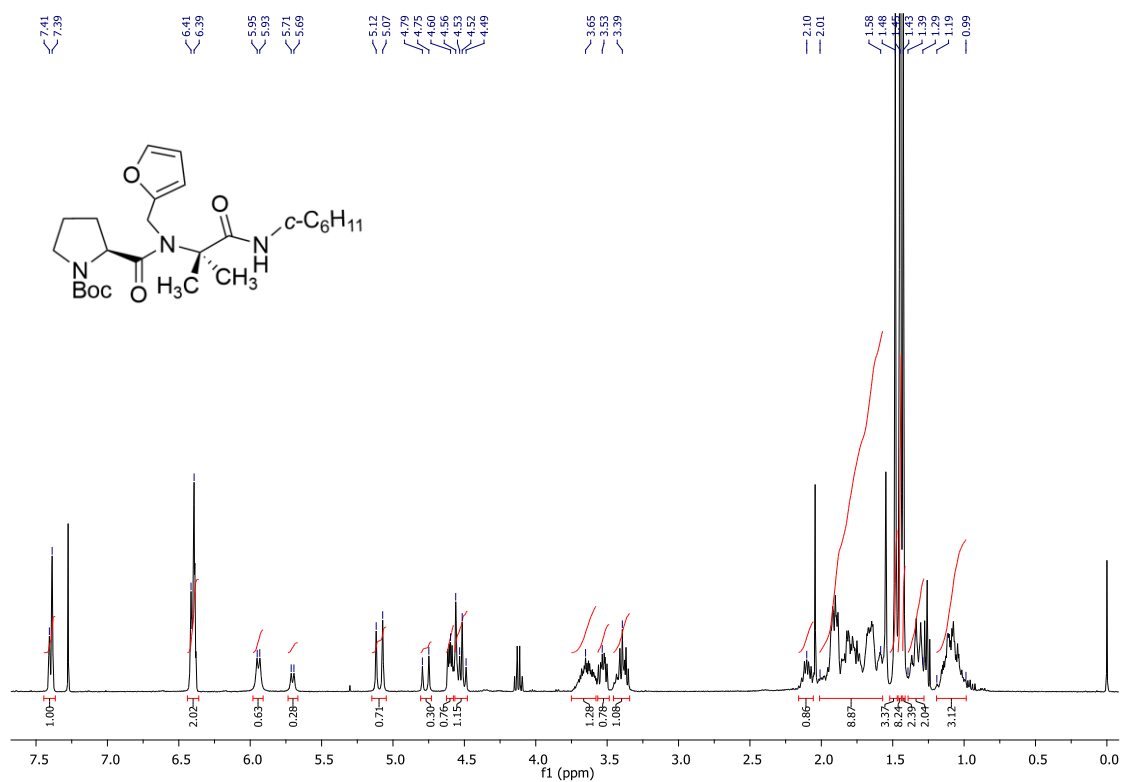

Figure S1: 400 MHz <sup>1</sup>H NMR spectrum in CDCl<sub>3</sub> of 1.

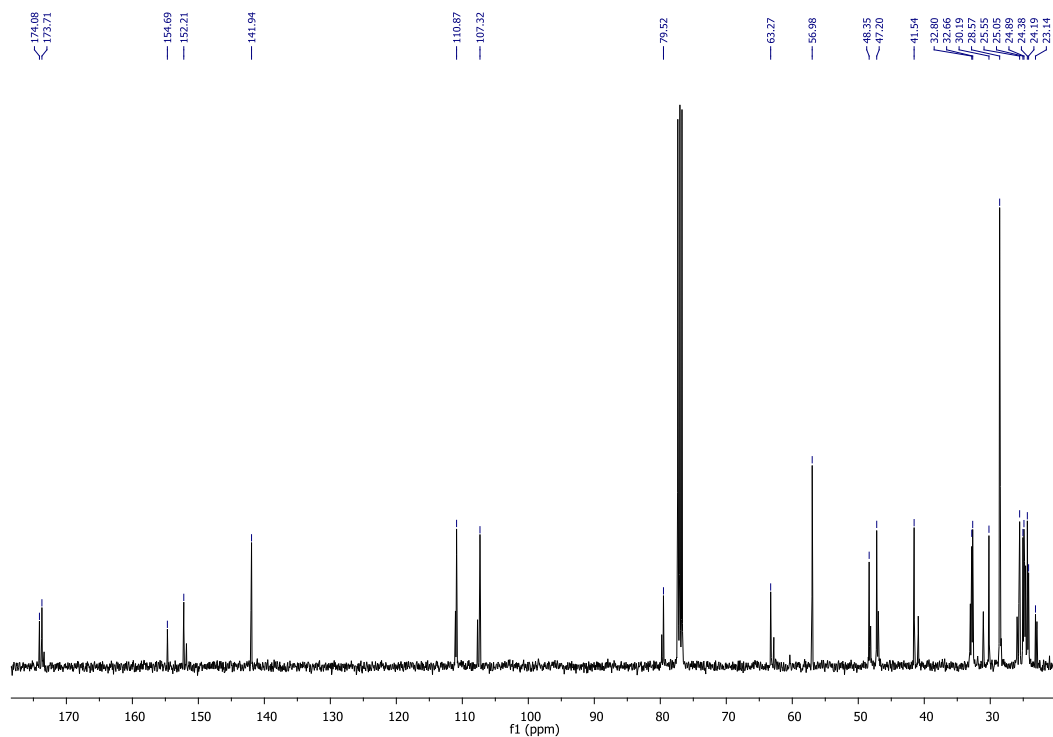

Figure S2: 100 MHz <sup>13</sup>C NMR spectrum in CDCl<sub>3</sub> of 1.

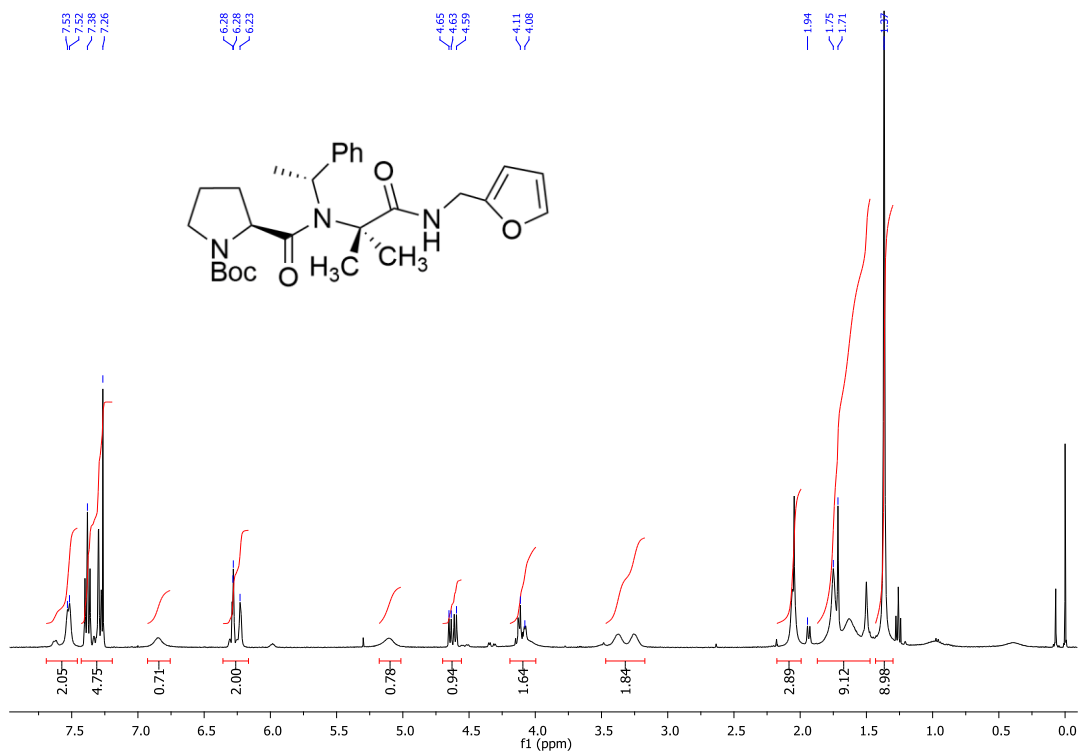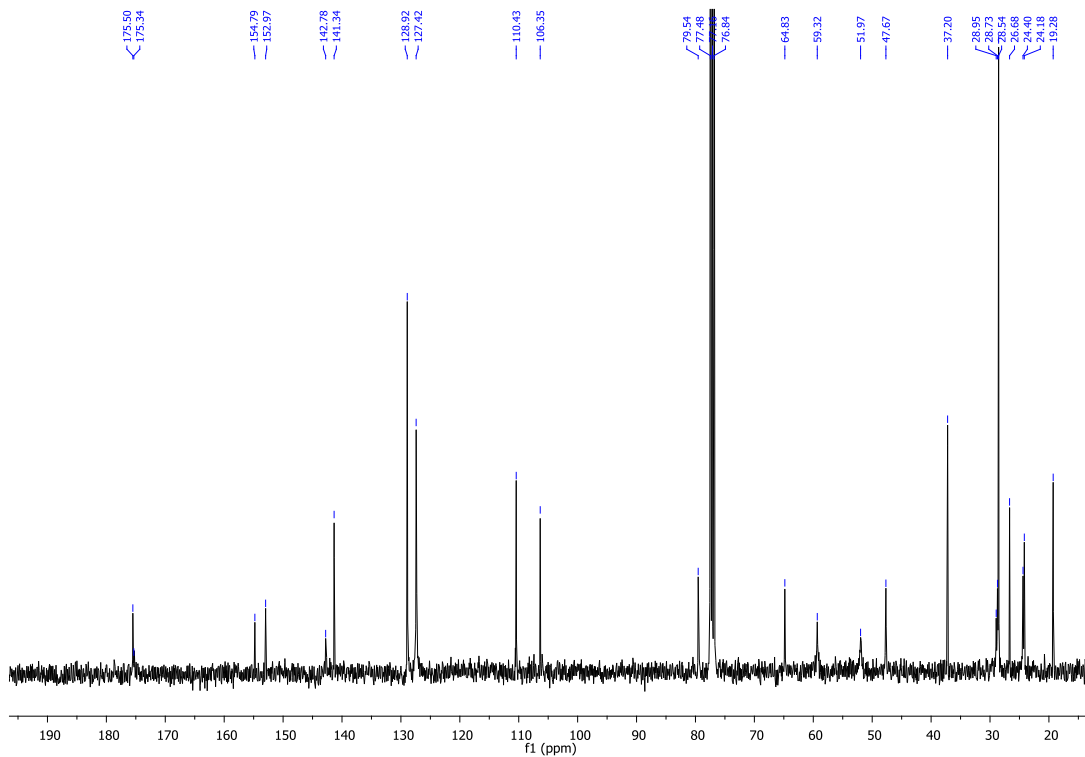

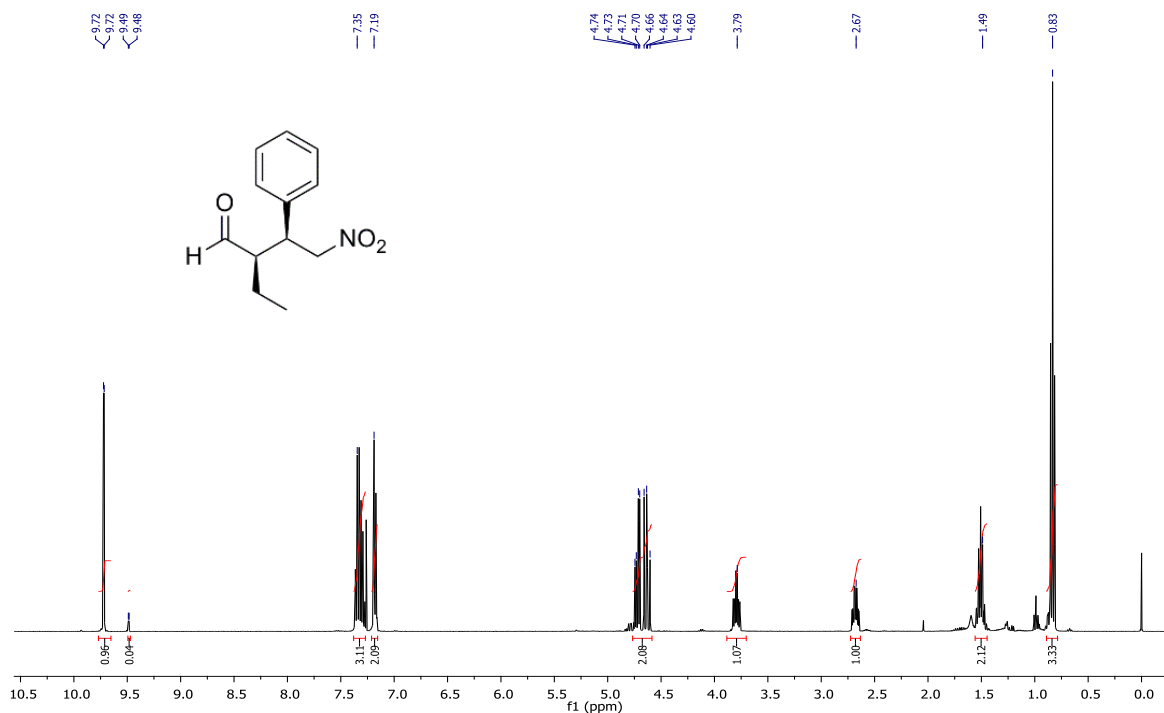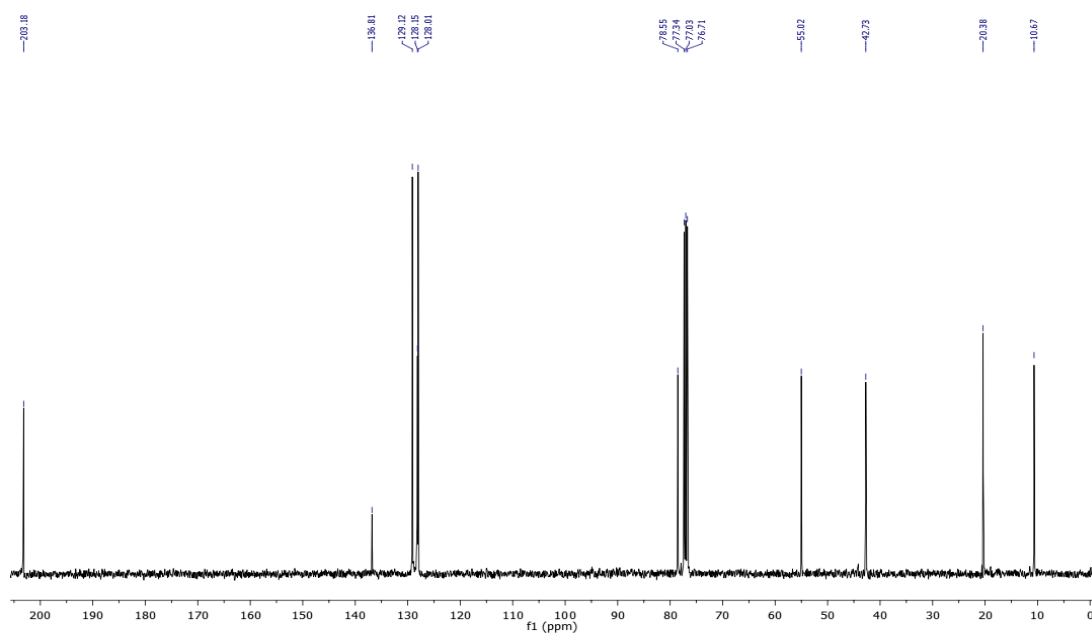

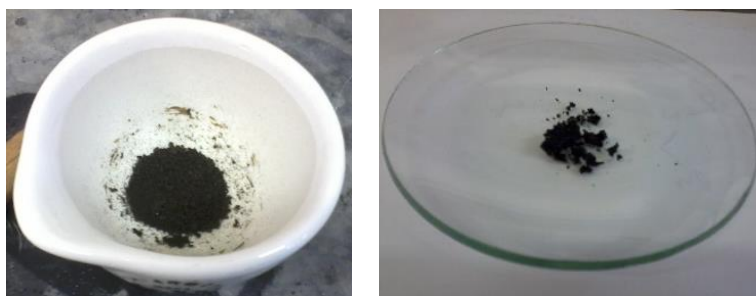

**Figure S7:** Photograph of PFA-supported catalysts material.

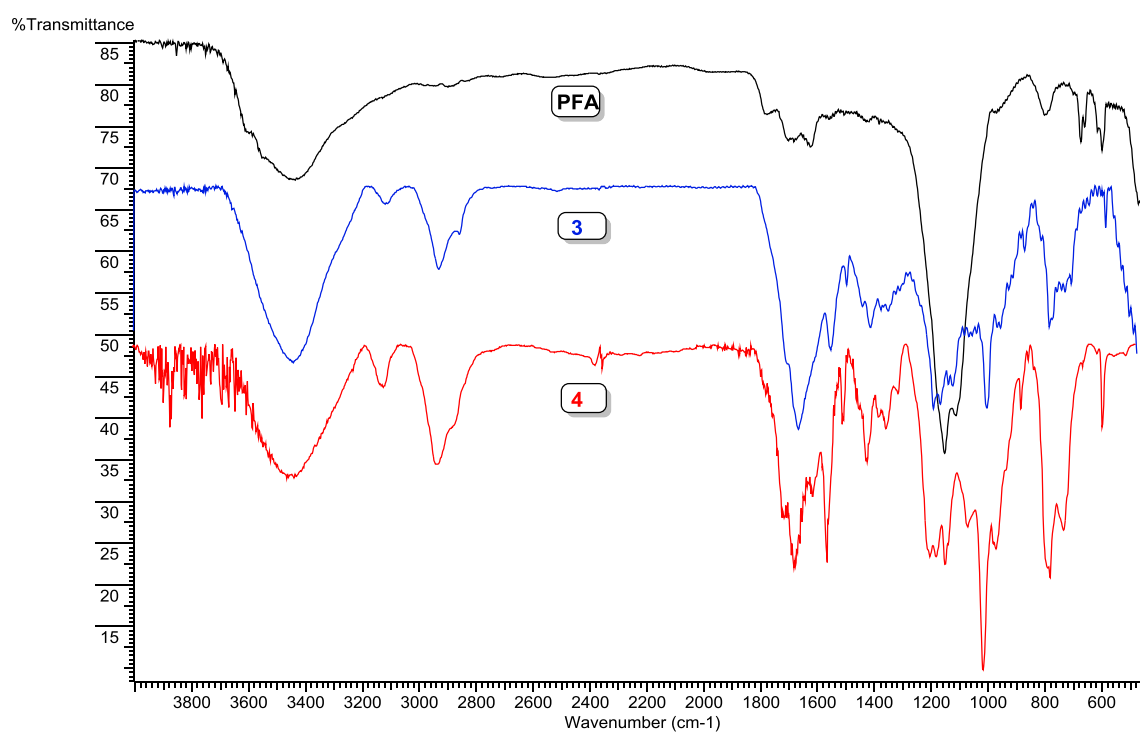

**Figure S8:** FT-IR spectra of polymers **PFA** (black), **3** (blue) and **4** (red) in the range of 4000–600  $\text{cm}^{-1}$ .

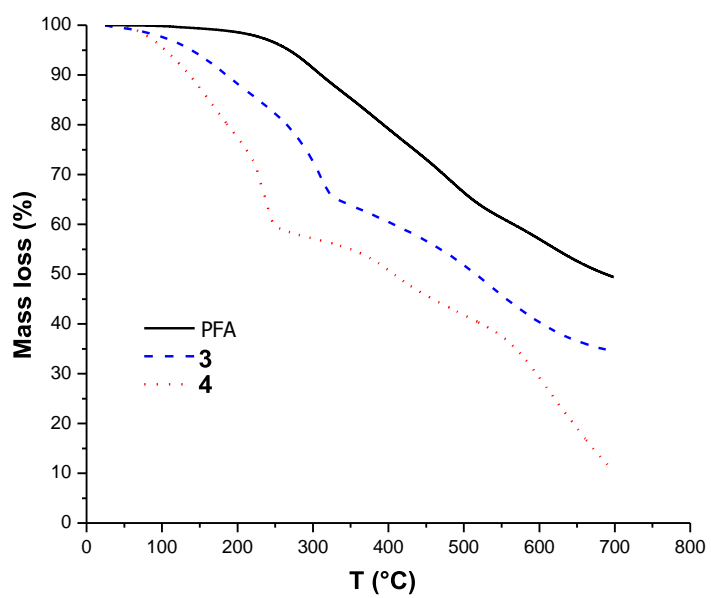

**Figure S9:** Variation of mass *versus* temperature measured by TGA for the **PFA**, **3** and **4** conducted under oxidative atmosphere at  $10\text{ }^{\circ}\text{C min}^{-1}$ .

## Chiral HPLC results and spectra

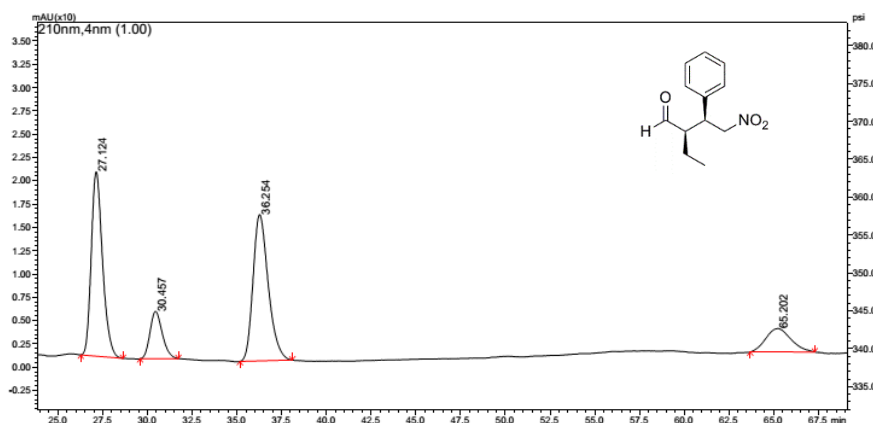

PeakTable

| Peak# | Ret. Time | Area    | Height | Area %  | Height % |
|-------|-----------|---------|--------|---------|----------|
| 1     | 27.124    | 867445  | 19800  | 37.957  | 45.951   |
| 2     | 30.457    | 242098  | 5070   | 10.593  | 11.767   |
| 3     | 36.254    | 931040  | 15712  | 40.739  | 36.463   |
| 4     | 65.202    | 244769  | 2508   | 10.710  | 5.819    |
| Total |           | 2285353 | 43090  | 100.000 | 100.000  |

**Figure S10:** Chiral HPLC of racemic 2-ethyl-4-nitro-3-phenylbutanal. Chiralpak OD-H (*n*-hexane/*i*PrOH 91:9), 25 °C at 0.9 ml min<sup>-1</sup>, UV detection at 210 nm.

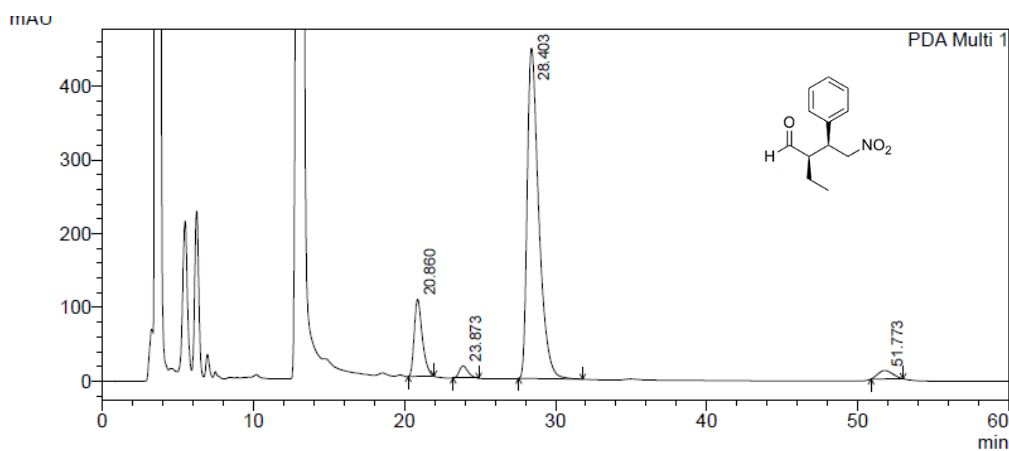

1 PDA Multi 1/210nm 4nm

PeakTable

| Peak# | Ret. Time | Area     | Height | Area %  | Height % |
|-------|-----------|----------|--------|---------|----------|
| 1     | 20.860    | 3875196  | 104361 | 13.278  | 17.997   |
| 2     | 23.873    | 674856   | 16601  | 2.312   | 2.863    |
| 3     | 28.403    | 23865884 | 447601 | 81.774  | 77.189   |
| 4     | 51.773    | 769271   | 11317  | 2.636   | 1.952    |
| Total |           | 29185207 | 579880 | 100.000 | 100.000  |

**Figure S11:** Chiral HPLC of the crude asymmetric 2-ethyl-4-nitro-3-phenylbutanal (**5**) obtained by bath reaction with PFA-supported catalyst **3**. Chiralpak OD-H (*n*-hexane/*i*PrOH 90:10), 25 °C) at 1.0 ml min<sup>-1</sup>, UV detection at 210 nm of the crude reaction.

**Table S1:** Results of continuous flow Michael addition between *n*-butanal and  $\beta$ -nitrostyrene using the microreactor filled with PFA-supported catalyst **3**.

| Entry <sup>a</sup> | Flow rate<br>$\phi$ ( $\mu\text{L min}^{-1}$ ) <sup>1)</sup> | Running<br>time (h) | Residence<br>time<br>$\tau$ (min) <sup>b</sup> | Conversion <sup>c</sup> | <i>dr.</i><br>( <i>syn:anti</i> ) <sup>e</sup> | ee% <sup>f</sup> |
|--------------------|--------------------------------------------------------------|---------------------|------------------------------------------------|-------------------------|------------------------------------------------|------------------|
| 1                  | 2.5                                                          | 0-10                | -                                              | -                       | -                                              | -                |
| 2                  | 2.5                                                          | 10-12               | 140                                            | 25                      | 95:5                                           | 74               |
| 3                  | 2.5                                                          | 12-14               | 140                                            | 27                      | 95:5                                           | 75               |
| 4                  | 2.5                                                          | 14-16               | 140                                            | 30                      | 95:5                                           | 74               |
| 5                  | 2.5                                                          | 16-18               | 140                                            | 31                      | 95:5                                           | 73               |
| 6                  | 2.5                                                          | 18-20               | 140                                            | 38                      | 95:5                                           | 74               |
| 7 <sup>d</sup>     | 2.5                                                          | 20-22               | 140                                            | 42                      | 95:5                                           | 72               |
| 8                  | 1                                                            | 24-36               | 349                                            | 43                      | 94:6                                           | 72               |
| 9                  | 1                                                            | 36-48               | 349                                            | 21                      | 94:6                                           | 72               |
| 10                 | 1                                                            | 48-72               | 349                                            | 24                      | 94:6                                           | 72               |

a) Reaction conditions: HPLC column (0.21 cm i.d. x 15 cm, containing 0.639 mmol of catalyst **3**);  $\beta$ -nitrostyrene (2.5 mmol, 1 equiv, 0.25 M), *n*-butanal (3 equiv, 0.75 M) in toluene. b) Residence time calculated as void volume/rate flow ( $\tau=V_0/\phi$ ). c) Conversion determined by <sup>1</sup>H NMR spectroscopy. d) Productivities are measured in mmol product h<sup>-1</sup> mmol catalyst<sup>-1</sup>. e) *dr* determined by <sup>1</sup>H NMR spectroscopy. f) Determined by chiral-stationary phase HPLC analysis.

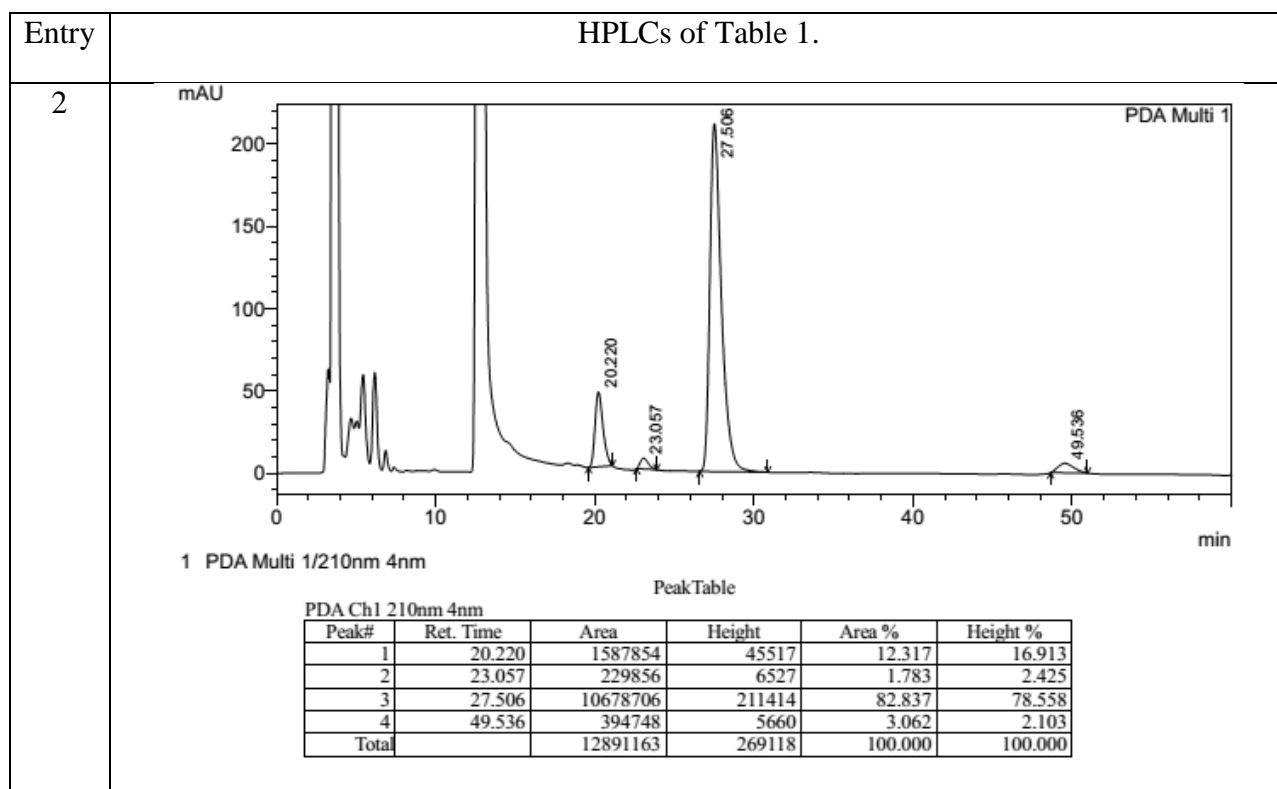



3

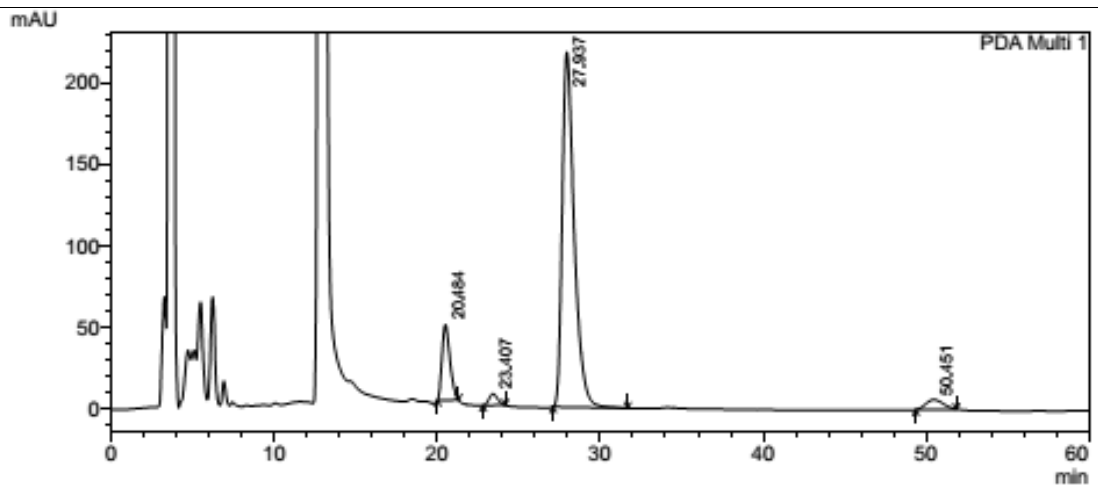

1 PDA Multi 1/210nm 4nm

PeakTable

PDA Ch1 210nm 4nm

| Peak# | Ret. Time | Area     | Height | Area %  | Height % |
|-------|-----------|----------|--------|---------|----------|
| 1     | 20.484    | 1557976  | 46209  | 11.639  | 16.702   |
| 2     | 23.407    | 260434   | 7046   | 1.946   | 2.547    |
| 3     | 27.937    | 11116474 | 217305 | 83.047  | 78.543   |
| 4     | 50.451    | 450875   | 6108   | 3.368   | 2.208    |
| Total |           | 13385758 | 276669 | 100.000 | 100.000  |

4

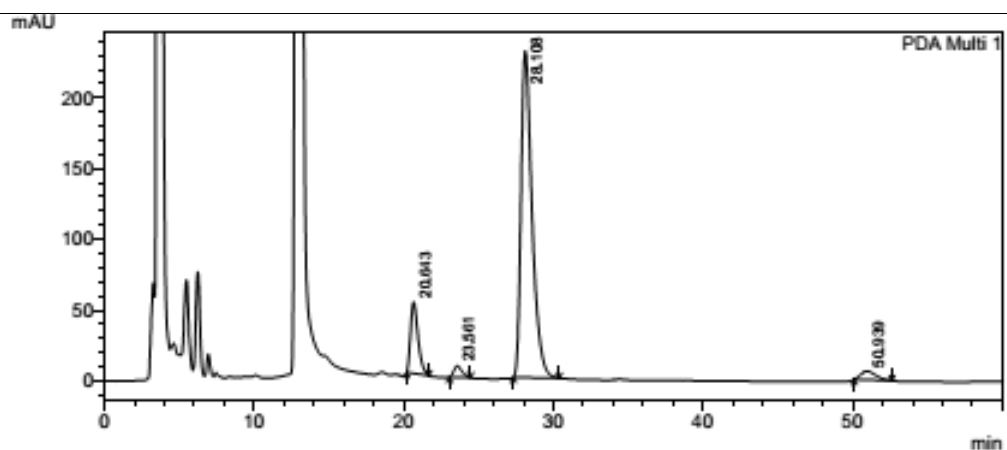

1 PDA Multi 1/210nm 4nm

PeakTable

PDA Ch1 210nm 4nm

| Peak# | Ret. Time | Area     | Height | Area %  | Height % |
|-------|-----------|----------|--------|---------|----------|
| 1     | 20.643    | 1759063  | 50465  | 12.300  | 17.081   |
| 2     | 23.561    | 304022   | 7992   | 2.126   | 2.705    |
| 3     | 28.108    | 11808725 | 230951 | 82.570  | 78.168   |
| 4     | 50.939    | 429640   | 6046   | 3.004   | 2.046    |
| Total |           | 14301450 | 295454 | 100.000 | 100.000  |

5

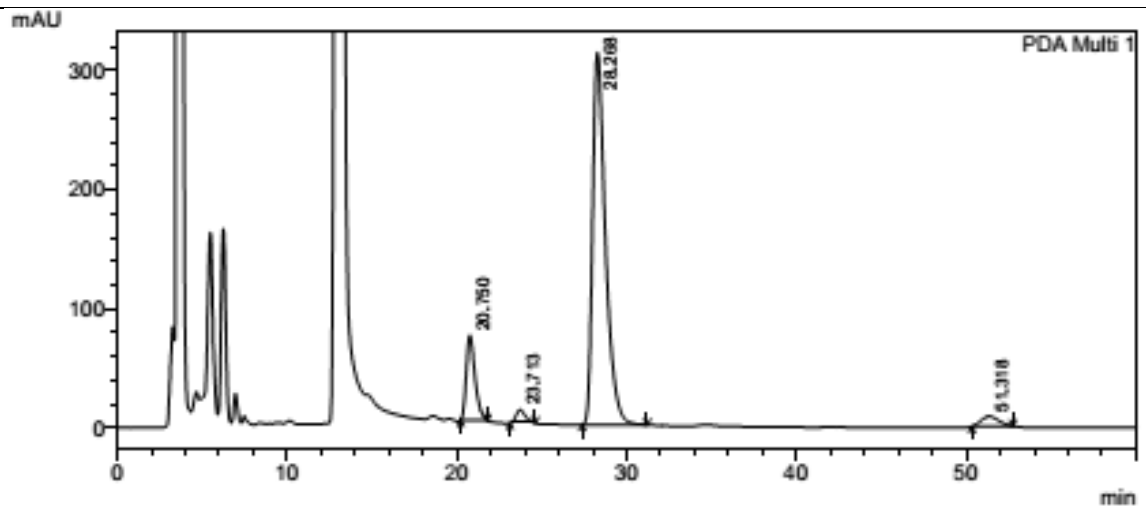

1 PDA Multi 1/210nm 4nm

PeakTable

PDA Ch1 210nm 4nm

| Peak# | Ret. Time | Area     | Height | Area %  | Height % |
|-------|-----------|----------|--------|---------|----------|
| 1     | 20.750    | 2558251  | 71344  | 12.801  | 17.688   |
| 2     | 23.713    | 430531   | 11138  | 2.154   | 2.761    |
| 3     | 28.268    | 16396233 | 312604 | 82.044  | 77.501   |
| 4     | 51.318    | 599641   | 8266   | 3.001   | 2.049    |
| Total |           | 19984657 | 403353 | 100.000 | 100.000  |

6

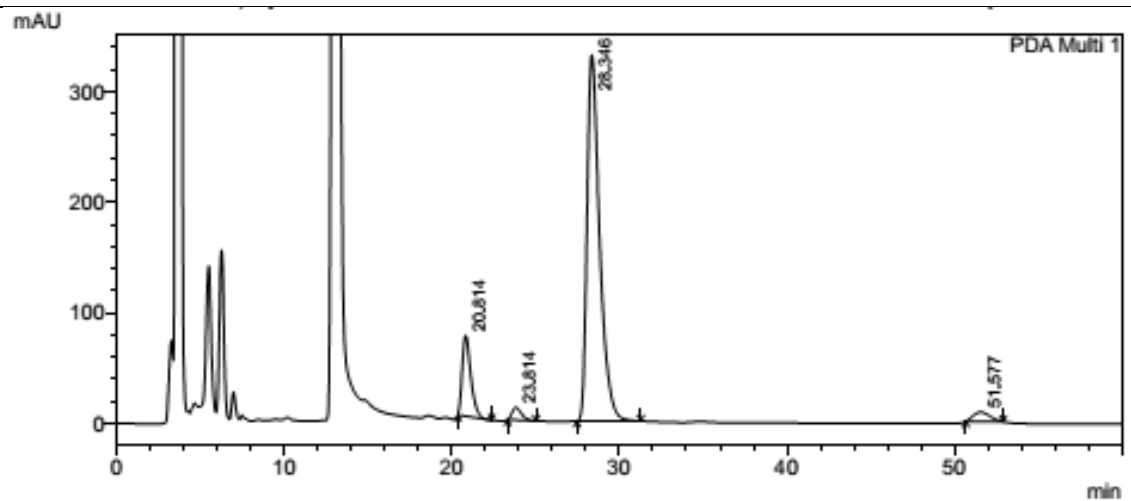

1 PDA Multi 1/210nm 4nm

PeakTable

PDA Ch1 210nm 4nm

| Peak# | Ret. Time | Area     | Height | Area %  | Height % |
|-------|-----------|----------|--------|---------|----------|
| 1     | 20.814    | 2609783  | 72871  | 12.500  | 17.194   |
| 2     | 23.814    | 445781   | 11406  | 2.135   | 2.691    |
| 3     | 28.346    | 17230466 | 330988 | 82.526  | 78.095   |
| 4     | 51.577    | 592685   | 8561   | 2.839   | 2.020    |
| Total |           | 20878715 | 423826 | 100.000 | 100.000  |

7

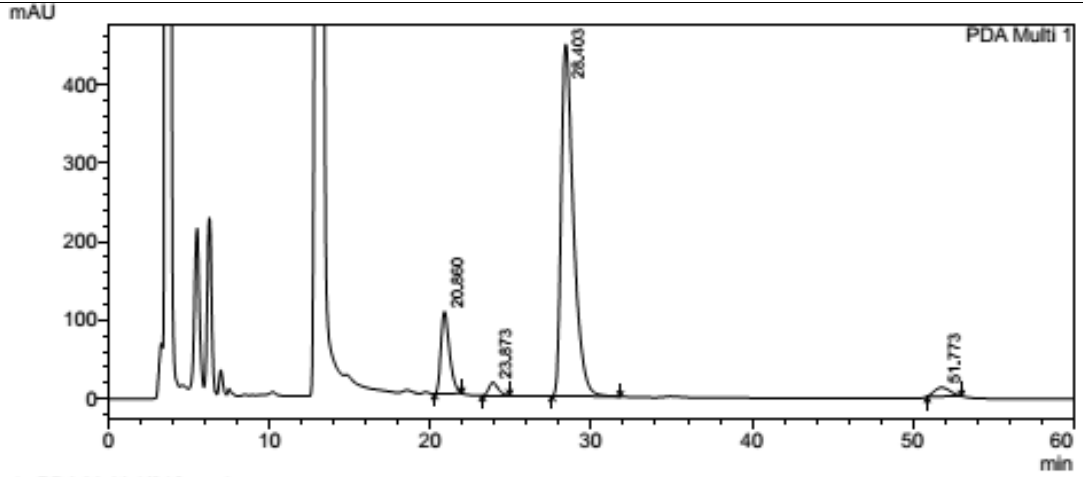

PeakTable

| Peak# | Ret. Time | Area     | Height | Area %  | Height % |
|-------|-----------|----------|--------|---------|----------|
| 1     | 20.860    | 3875196  | 104361 | 13.278  | 17.997   |
| 2     | 23.873    | 674856   | 16601  | 2.312   | 2.863    |
| 3     | 28.403    | 23865884 | 447601 | 81.774  | 77.189   |
| 4     | 51.773    | 769271   | 11317  | 2.636   | 1.952    |
| Total |           | 29185207 | 579880 | 100.000 | 100.000  |

8

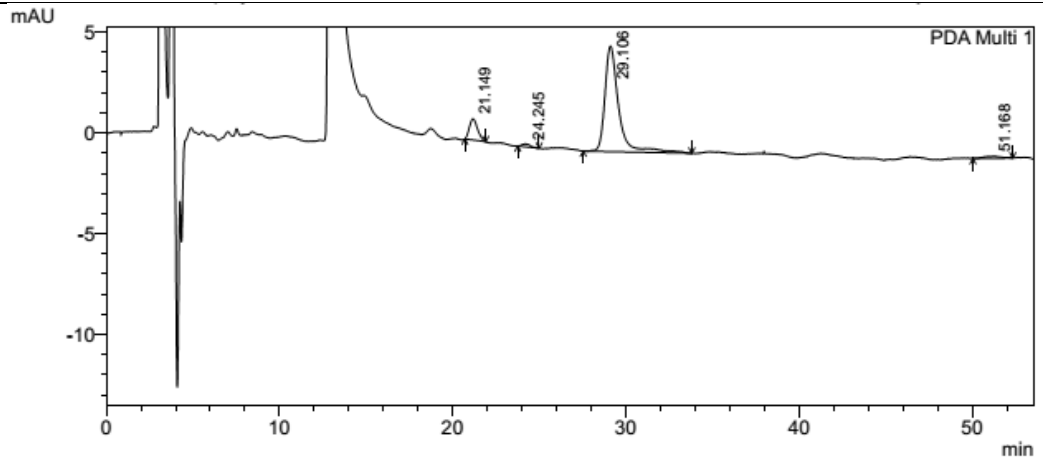

PeakTable

| Peak# | Ret. Time | Area   | Height | Area %  | Height % |
|-------|-----------|--------|--------|---------|----------|
| 1     | 21.149    | 34196  | 1054   | 10.236  | 16.098   |
| 2     | 24.245    | 4504   | 148    | 1.348   | 2.267    |
| 3     | 29.106    | 288448 | 5240   | 86.342  | 80.030   |
| 4     | 51.168    | 6929   | 105    | 2.074   | 1.606    |
| Total |           | 334078 | 6547   | 100.000 | 100.000  |

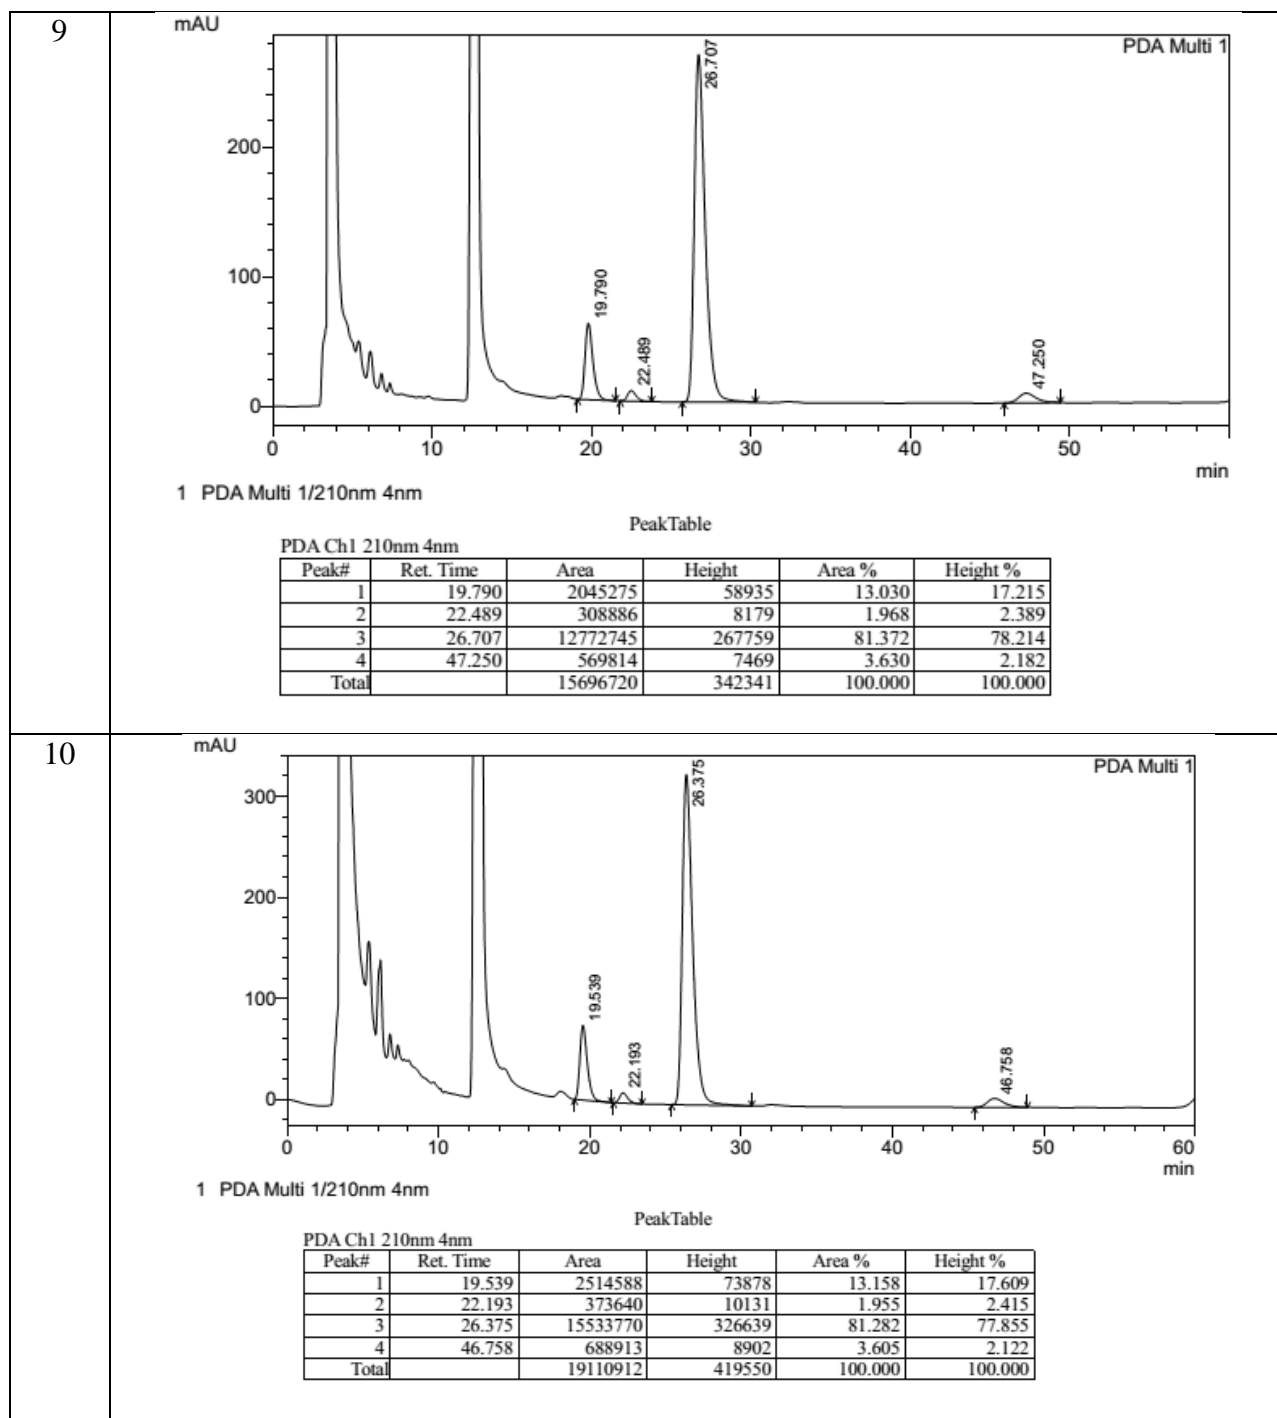

**Figure S12:** Different examples of chiral HPLC analysis of the crude asymmetric 2-ethyl-4-nitro-3-phenylbutanal (**5**) obtained by continuous flow Michael addition reaction with PFA-supported catalyst **3** (Table S1). Chiralpak OD-H (*n*-hexane/*i*PrOH 90:10), 25 °C, 1.0 ml min<sup>-1</sup>, UV detection at 210 nm of the crude reaction.
